# Supplementary material
Source: ML conference proceedings conference paper supplement (https://openaccess.thecvf.com/content/ICCV_2019/html/Piergiovanni_Evolving_Space-Time_Neural_ICCV_2019_paper.html)
Supplement: Supplementary file 1 [file Piergiovanni_Evolving_Space-Time_Neural_ICCV_2019_supplemental.pdf]

Archive with 1 entries (1 files):
- 3505_supp.pdf
