# Supplementary material
Source: ML conference proceedings conference paper supplement (https://openaccess.thecvf.com/content/ICCV_2019/html/Piergiovanni_Evolving_Space-Time_Neural_ICCV_2019_paper.html)
Supplement: Supplementary file 1 [file Piergiovanni_Evolving_Space-Time_Neural_ICCV_2019_supplemental.pdf › 3505_supp.pdf]

# Evolving Space-Time Neural Architectures for Videos

## - Supplementary Material -

AJ Piergiovanni, Anelia Angelova, Alexander Toshev, Michael S. Ryoo  
Google Brain

{ajpiergi, anelia, toshev, mryoo}@google.com

### A. Inception-like meta-architecture

Similar to Fig. 4 of the main paper describing ResNet-like meta-architecture, we also describe the Inception-like meta-architecture we used. Fig. 2 describes the architecture with nine modifiable modules, it has a ‘stem’ of five modules. Note that the modules are evolved to be heterogeneous, having different combination of multiple conv. and pooling layers for each module. We describe multiple examples of such evolved architectures following the Inception-like meta-architectures in Figs. 3, 4, 5, 6, 7, 8, 9, 10, and 11.

### B. Evolution training details

Our architecture evolution was done with 50 parallel workers. Each worker selects  $S = 25$  random samples from the population to generate one new child architecture based on the individual with the highest fitness (i.e., the parent). The architecture is trained using 12 GPUs on the training data. As training video CNNs is computationally expensive, during the search, we train the models with video segments of size  $32 \times 176 \times 176$  (for HMDB and Kinetics) or  $64 \times 176 \times 176$  (for Charades) where 32 and 64 are the number of frames. We use the batch size of 144 (12 per GPU). Each newly generated child architecture is trained for 1000 iterations (i.e., it looks at 144000 samples), then evaluated with a separate validation set of 1000 examples. The classification accuracy measured using the validation becomes the ‘fitness’ used in our algorithm. We observed that relative recognition performances of the models (on the validation set) is stable after training for 1000 iterations, and we used this setting in our evolutionary algorithm to reduce the model training time necessary for the architecture evaluation.

### C. Mutation rate

In Fig. 1, we compare the architecture evolution done with a constant mutation rate of 1 or 3 (per round) and our annealed mutation rate. As we described in the main sec-

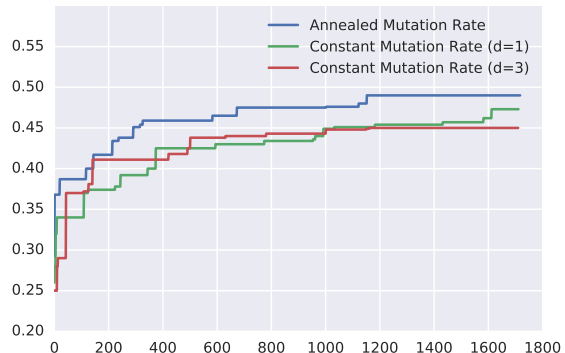

Figure 1. Comparison of the architecture search with various mutation rates. We observe that the constant rate takes longer to reach higher performance while the higher mutation rate initially learns faster, but plateaus at a lower value. Annealing the mutation rate based on the number of architectures evaluated provides the best performance. The  $x$ -axis is the number of evolutionary rounds and the  $y$ -axis is the accuracy after training for 1000 iterations.

tion of the paper, our evolutionary algorithm applies a set of random mutation operators at each round. In our annealed mutation rate strategy, the number of the mutation operators to apply is decided based on the evolution round  $i$ : it starts with  $d = 7$  mutations initially and it is linearly decreased by  $\lfloor i/r \rfloor$  where  $r$  is 100 in our experimental setting. That is, at the  $i$ th round, a total of  $\max(\lfloor d - i/r \rfloor, 1)$  random mutations were applied to the parent. We find that the annealed mutation rate performs the best. Our strategy allows the search to explore more diverse architectures based on the best initial models, but then refine the top performing models after many evolution rounds.

### D. Supplementary results and experiments

In addition to the experimental results in the main paper, we below provide additional tables comparing our EvaNet against more detailed baselines sharing the same meta-architecture as our EvaNet. Table 1 compares base-

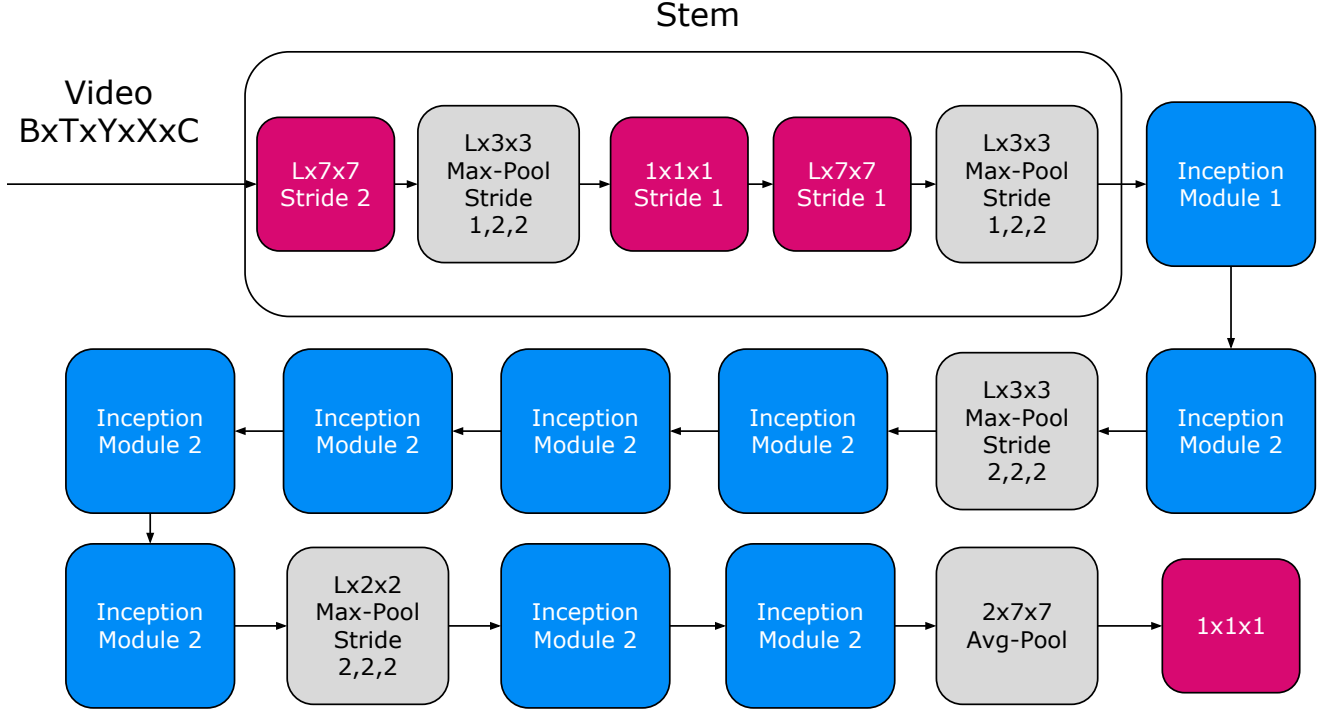

Figure 2. Inception-like meta-architecture.

Table 1. Kinetics performance comparison to baselines.

|                                      | RGB  | Flow | RGB+F       |
|--------------------------------------|------|------|-------------|
| Baselines                            |      |      |             |
| 3D Conv                              | 70.6 | 62.1 | 72.6        |
| (2+1)D Conv                          | 71.1 | 62.5 | 74.3        |
| iTGM Conv                            | 71.2 | 62.8 | 74.4        |
| 3D-Ensemble                          |      |      | 74.6        |
| iTGM-Ensemble                        |      |      | 74.7        |
| Top individual models from evolution |      |      |             |
| Top 1                                | 71.9 | 63.8 | <b>76.4</b> |
| Top 2                                | 71.7 | 64.9 | 75.5        |
| Top 3                                | 72.9 | 64.8 | 75.7        |
| EvaNet                               |      |      | <b>77.2</b> |

line and EvaNet models only using RGB input, optical flow input, and both. Table 2 illustrates the performances of our EvaNet as well as previous works on two different settings of Kinetics-400. Note that Kinetics is periodically removing some of its training/validation/testing videos, and the accuracies of the approach thus changes depending on which version they were trained/tested on, thus the results are not directly comparable to the ones published on the larger set. Table 3 compares EvaNet with various baselines similar to Table 1, this time using the Charades dataset.

Table 2. Kinetics-400 accuracy. Note that \* are the reported numbers on the initial Kinetics dataset, which is no longer available. We report the numbers based on the new Kinetics version from Nov 2018. The new version has 8% less training/validation videos.

| Method                | Kinetics-400 |       |
|-----------------------|--------------|-------|
|                       | new          | old   |
| Two-stream I3D [1]    | 72.6         | 74.1* |
| Two-stream (2+1)D [2] | -            | 75.4* |
| ResNet-50 (2+1)D      | 72.1         | -     |
| ResNet-101 (2+1)D     | 72.8         | -     |
| Two-stream S3D-G [4]  | 76.2         | 77.2* |
| Non-local NN [3]      | -            | 77.7* |
| ResNet-50 + Non-local | 73.5         | -     |
| EvaNet (ours)         | <b>77.2</b>  | -     |

## E. Discovered architectures

We here present diverse architectures evolved in the following figures. The color of each layer corresponds to a specific layer type. Check Fig. 1 of the main paper for the illustration.

In Figures 3, 4, and 5, we show the Inception-like architectures found when searching on Kinetics using RGB inputs. We observe that the networks learn quite different architectures. For example, the third inception module is quite different in all three networks. In Figures 6, 7, and

Table 3. Charades performance comparison to baselines, all initialized with ImageNet or Kinetics weights.

|                                      | ImageNet    | Kinetics    |
|--------------------------------------|-------------|-------------|
| Baselines                            |             |             |
| 3D Conv                              | 17.2        | 34.6        |
| (2+1)D Conv                          | 17.1        | 34.7        |
| iTGM Conv                            | 17.2        | 34.9        |
| 3D-Ensemble                          | 17.4        | 35.2        |
| iTGM-Ensemble                        | 17.8        | 35.7        |
| Top individual models from evolution |             |             |
| Top 1                                | 22.3        | <b>37.3</b> |
| Top 2                                | <b>24.1</b> | 36.8        |
| Top 3                                | 23.2        | 36.6        |
| EvaNet                               | <b>26.6</b> | <b>38.1</b> |

8, we illustrate the models found when searching on Kinetics using optical flow as input. When using optical flow as input, we observe that the architectures prefer to use layers with shorter temporal durations, using very few layers with size 11 and 9 when compared to the RGB networks. (2+1)D conv layers and iTGM layers were used much more commonly in both RGB and optical flow architectures. Parallel space-time conv and pooling layers with different temporal lengths were also very commonly observed.

In Figures 9, 10, and 11, we illustrate the Inception-like architectures evolved on Charades. We observe that on Charades, the architectures generally capture longer temporal intervals (e.g., the first layer has size 11) and many layers contain longer kernels (i.e., 9 and 11) especially compared to the architectures found on Kinetics.

In addition, we also illustrate evolved architectures based on our ResNet-like meta-architecture. Similar to the above mentioned figures, we show three examples of evolved architectures per Kinetics-RGB and Kinetics-Flow. Figs. 12, Figs. 13, Figs. 14, Figs. 15, Figs. 16, and Figs. 17 show the architectures.

## References

- [1] J. Carreira and A. Zisserman. Quo vadis, action recognition? a new model and the kinetics dataset. In *Proceedings of the IEEE Conference on Computer Vision and Pattern Recognition (CVPR)*, 2017. 2
- [2] D. Tran, H. Wang, L. Torresani, J. Ray, Y. LeCun, and M. Paluri. A closer look at spatiotemporal convolutions for action recognition. In *Proceedings of the IEEE Conference on Computer Vision and Pattern Recognition (CVPR)*, 2018. 2
- [3] X. Wang, R. Girshick, A. Gupta, and K. He. Non-local neural networks. In *Proceedings of the IEEE Conference on Computer Vision and Pattern Recognition (CVPR)*, 2018. 2
- [4] S. Xie, C. Sun, J. Huang, Z. Tu, and K. Murphy. Rethinking spatiotemporal feature learning for video understanding, 2018. 2

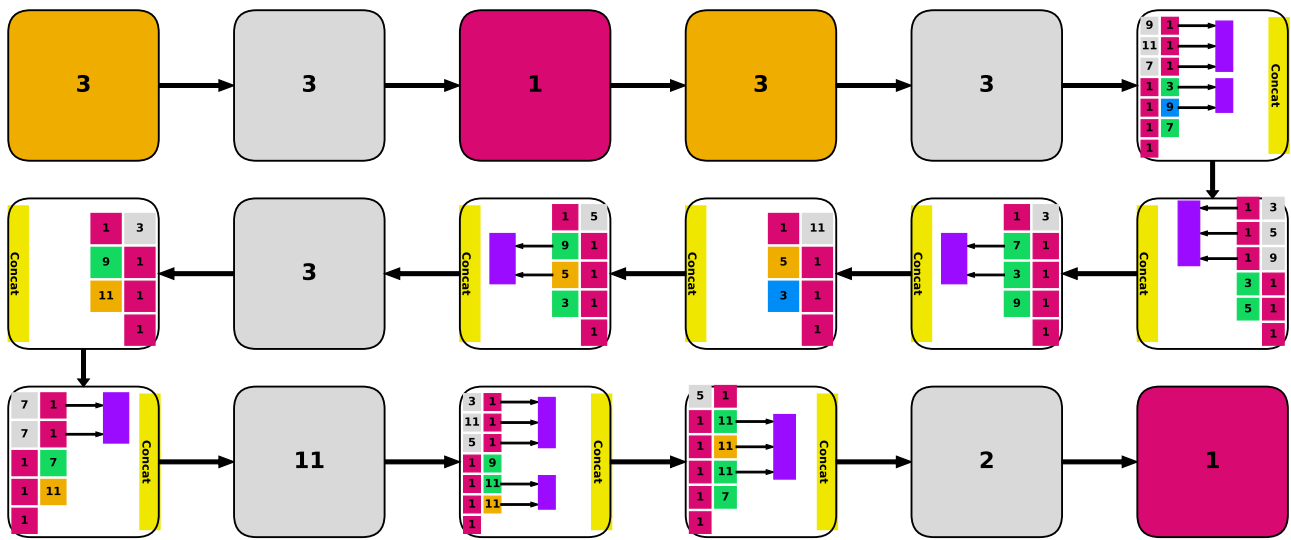

Figure 3. Kinetics RGB Top 1 with Inception Meta-architecture.

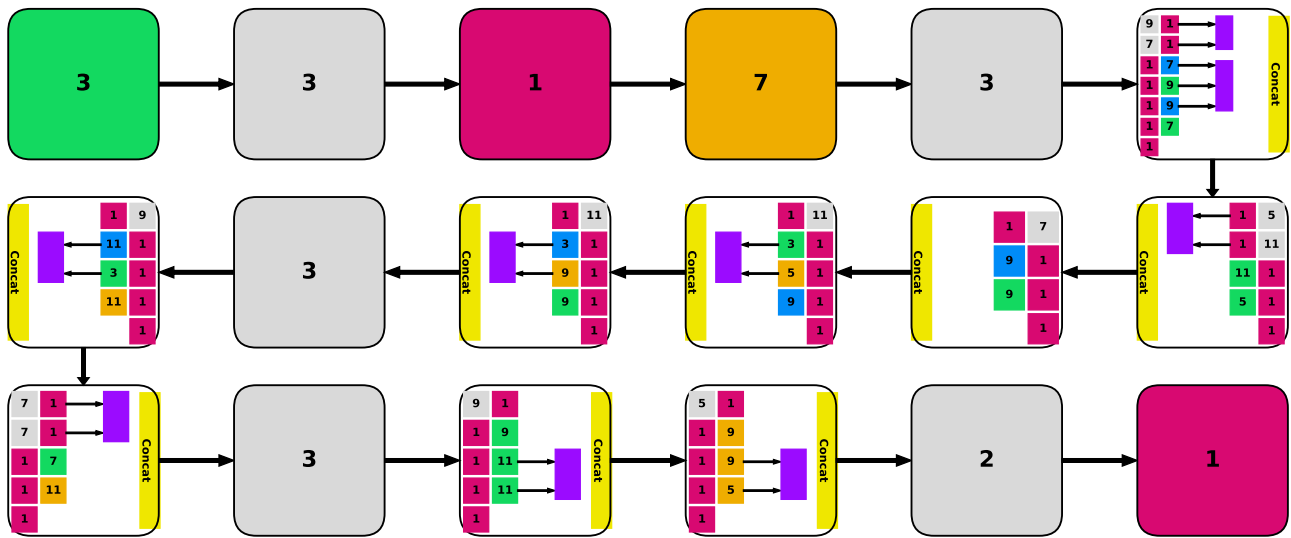

Figure 4. Kinetics RGB Top 2 with Inception Meta-architecture.

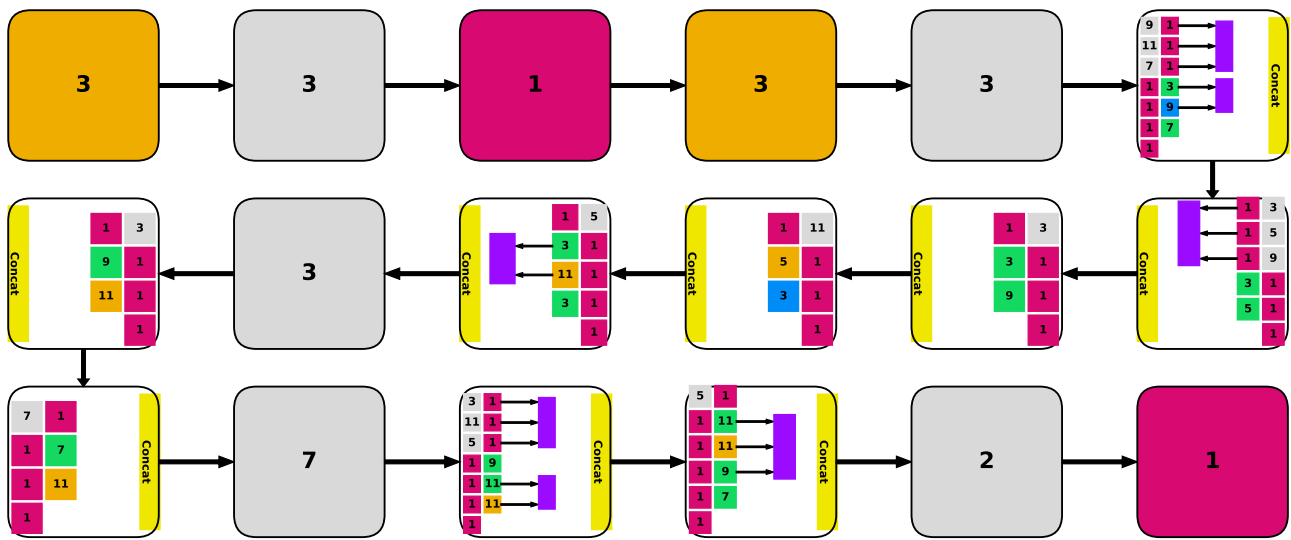

Figure 5. Kinetics RGB Top 3 with Inception Meta-architecture.

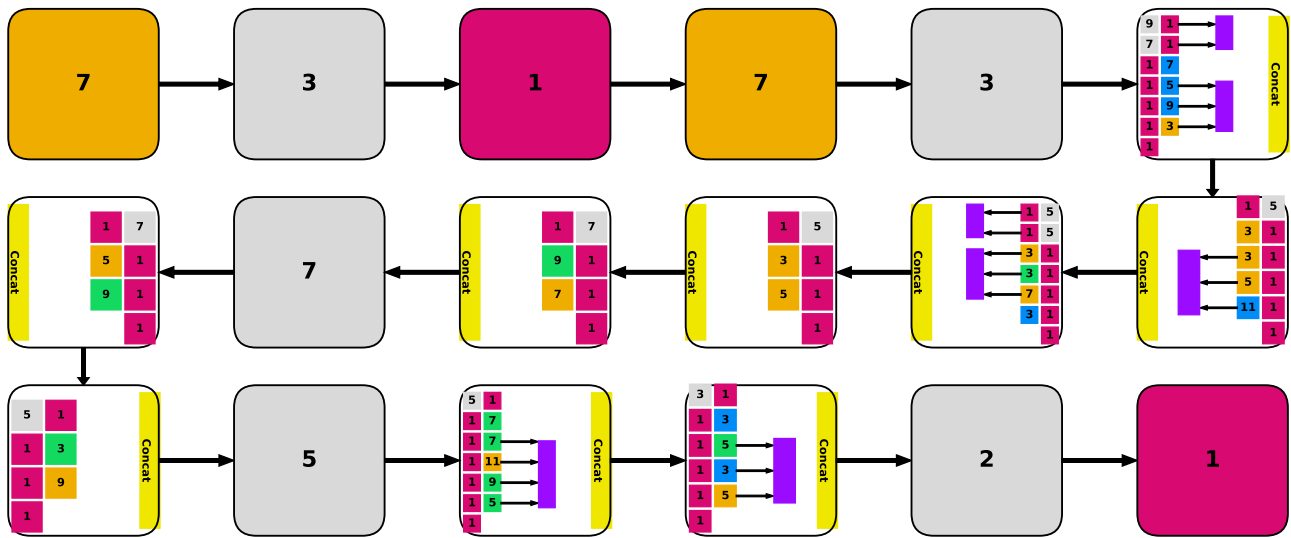

Figure 6. Kinetics optical flow Top 1 with Inception Meta-architecture.

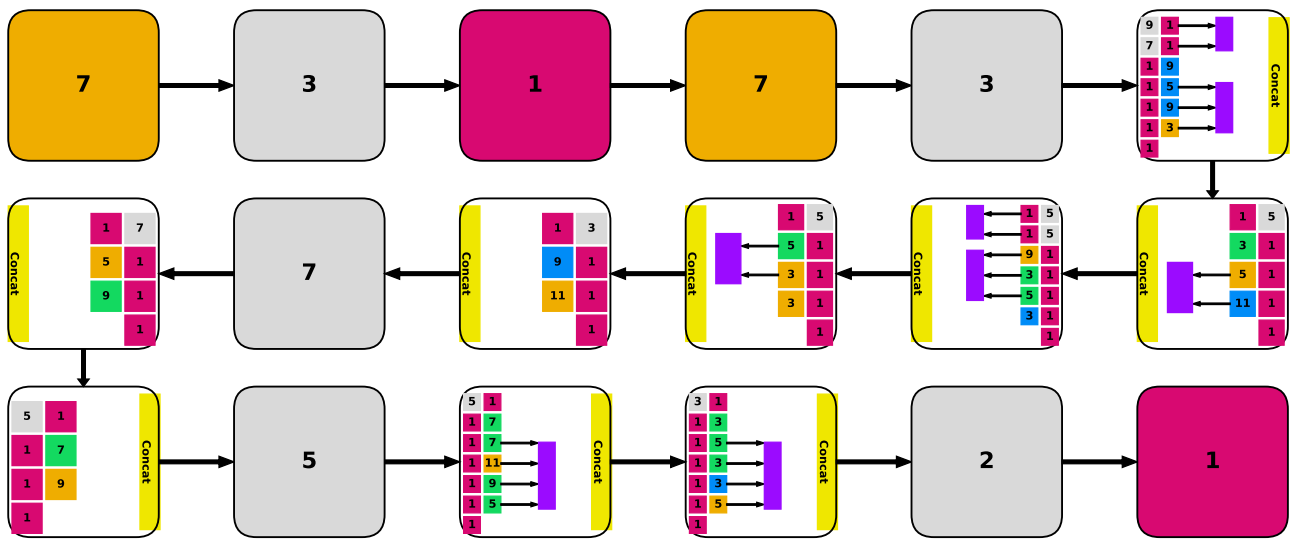

Figure 7. Kinetics optical flow Top 2 with Inception Meta-architecture.

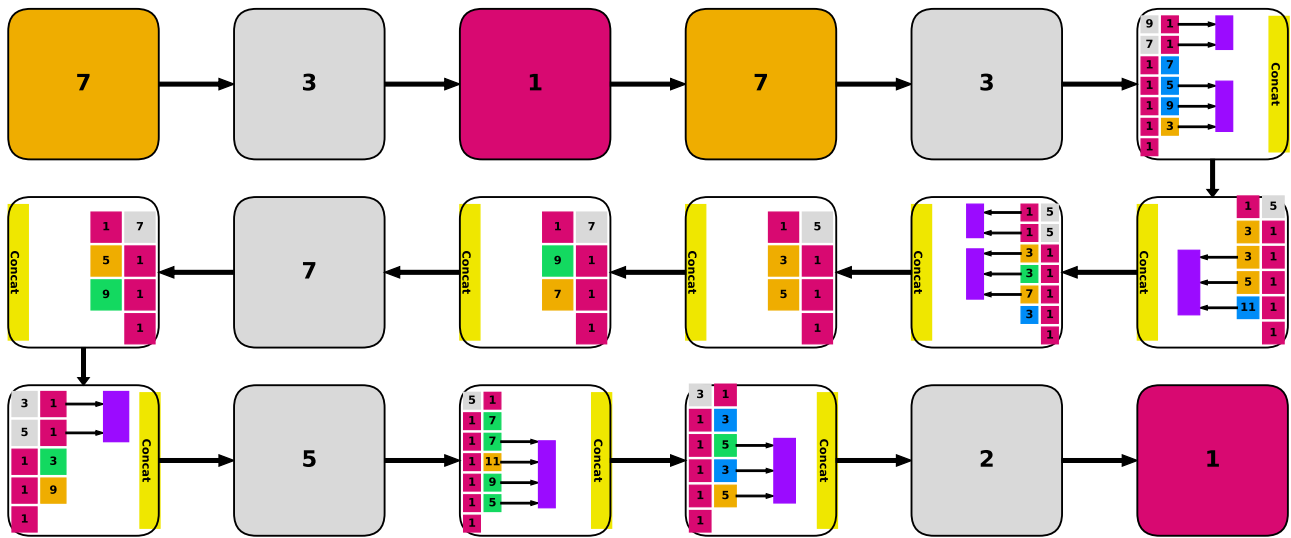

Figure 8. Kinetics optical flow Top 3 with Inception Meta-architecture.

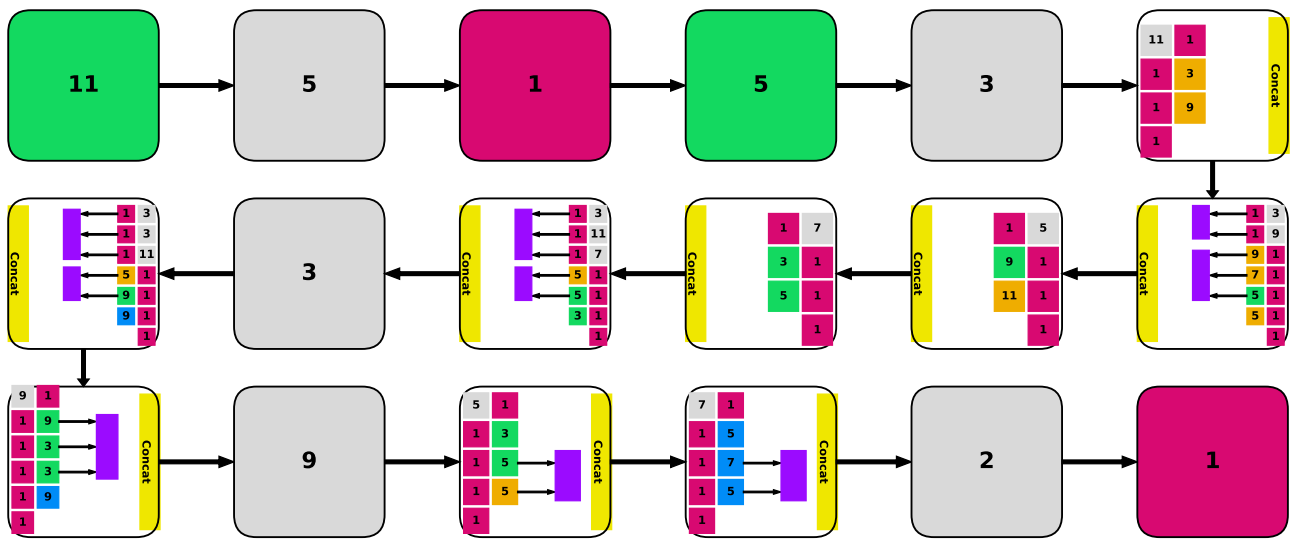

Figure 9. Charades RGB Top 1.

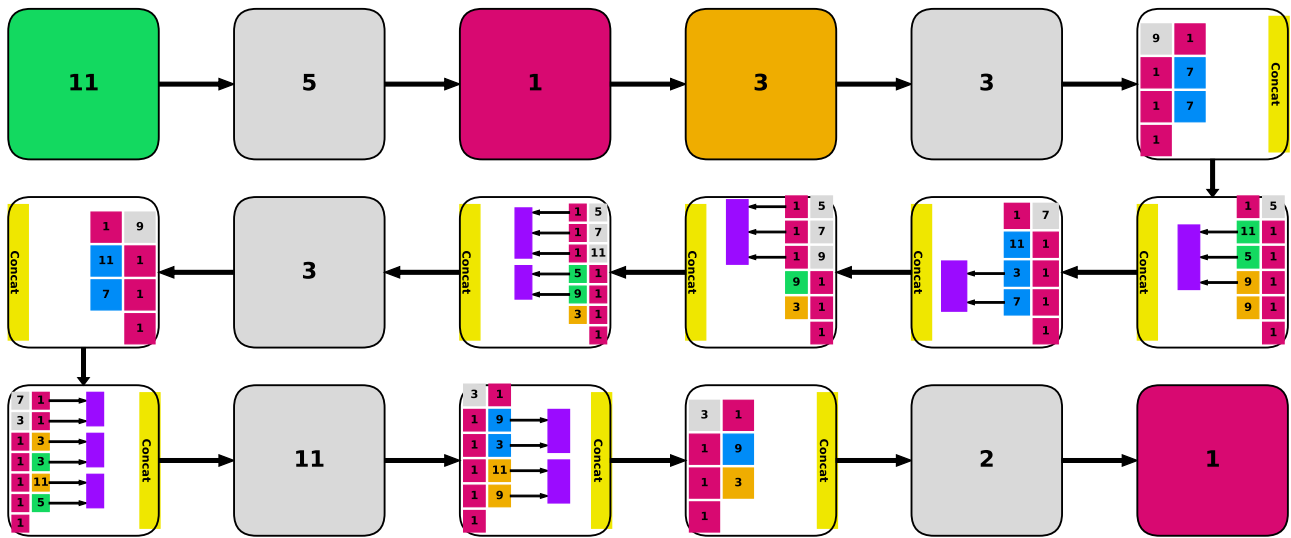

Figure 10. Charades RGB Top 2.

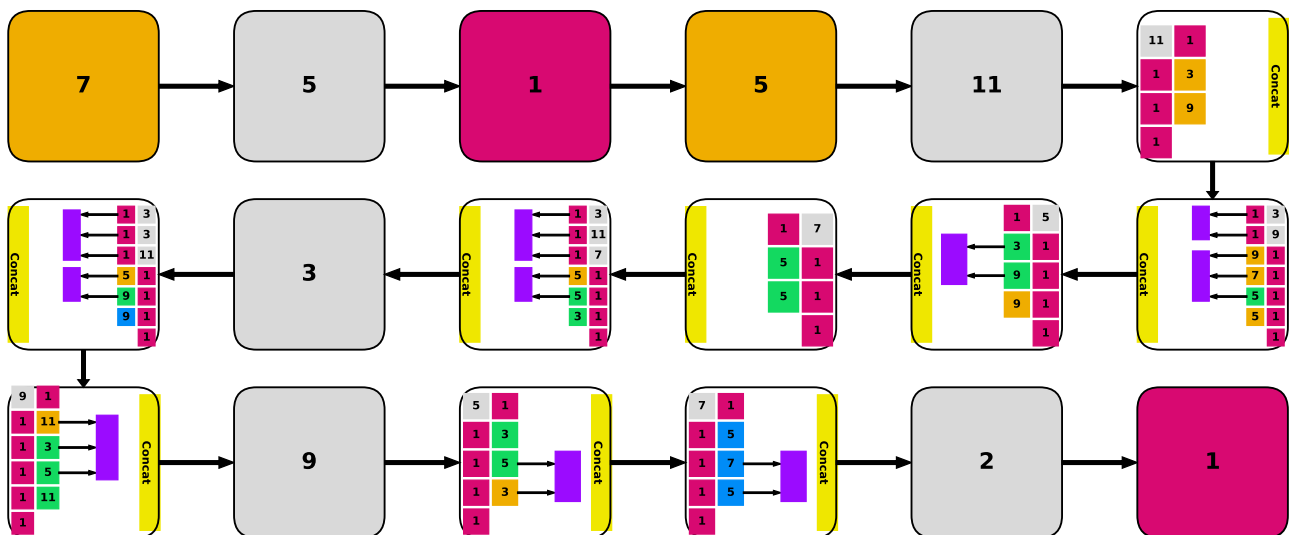

Figure 11. Charades RGB Top 3.

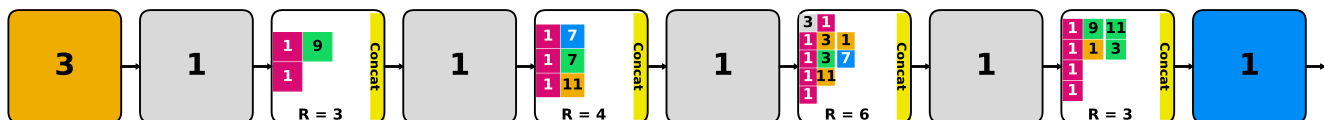

Figure 12. Kinetics RGB Top 1 with ResNet Meta-Architecture.

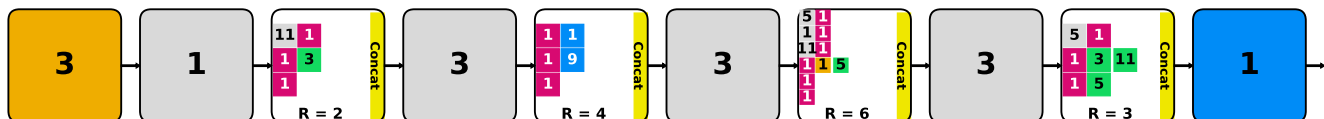

Figure 13. Kinetics RGB Top 2 with ResNet Meta-Architecture.

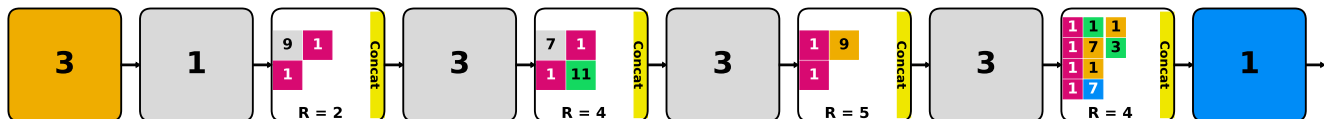

Figure 14. Kinetics RGB Top 3 with ResNet Meta-Architecture.

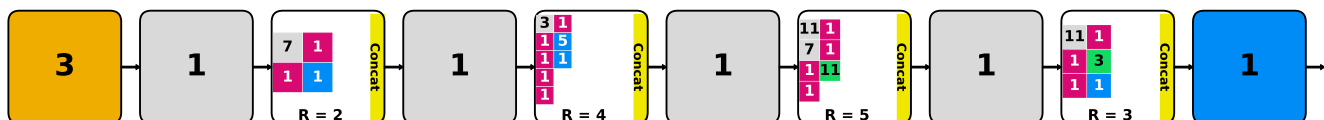

Figure 15. Kinetics optical flow Top 1 with ResNet Meta-Architecture.

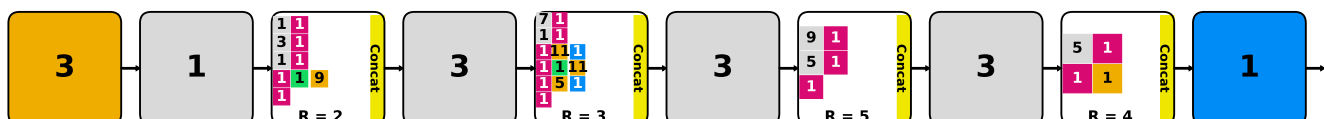

Figure 16. Kinetics optical flow Top 2 with ResNet Meta-Architecture.

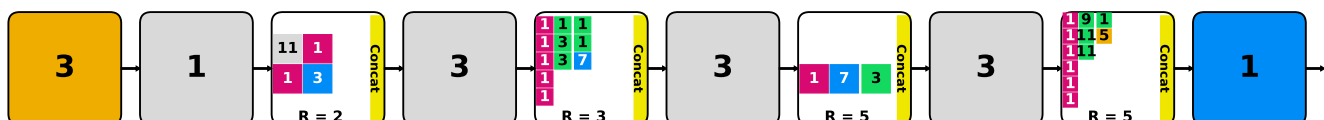

Figure 17. Kinetics optical flow Top 3 with ResNet Meta-Architecture.
